# Supplementary material for: Synthesis and in Silico Investigation of Organoselenium-Clubbed Schiff Bases as Potential Mpro Inhibitors for the SARS-CoV-2 Replication
Source: MDPI journal article supplement (doi:10.3390/life13040912), 2023-03-30
Supplement: s1 [file s1]

## Supplementary Information

# Synthesis and in Silico Investigation of Organoselenium Clubbed Schiff Bases as Potential M<sup>pro</sup> Inhibitors for the SARS-CoV-2 Replication

Saad Shaaban <sup>1,2,\*</sup>, Aly Abdou <sup>3,\*</sup>, Abdulrahman G. Alhamzani <sup>4</sup>, Mortaga M. Abou-Krishna <sup>4,5</sup>, Mahmoud A. Al-Qudah <sup>4,6</sup>, Mohamed Alaasar <sup>7,8</sup>, Ibrahim Youssef <sup>2</sup> and Tarek A. Yousef <sup>4,9,\*</sup>

<sup>1</sup> Department of Chemistry, College of Science, King Faisal University, Al-Ahsa 31982, Saudi Arabia

<sup>2</sup> Department of Chemistry, Faculty of Science, Mansoura University, Mansoura 35516, Egypt

<sup>3</sup> Department of Chemistry, Faculty of Science, Sohag University, Sohag 82524, Egypt

<sup>4</sup> College of Science, Chemistry Department, Imam Mohammad Ibn Saud Islamic University, Riyadh 11623, Saudi Arabia

<sup>5</sup> Department of Chemistry, South Valley University, Qena 83523, Egypt

<sup>6</sup> Department of Chemistry, Faculty of Science, Yarmouk University, Irbid 21163, Jordan

<sup>7</sup> Institute of Chemistry, Martin Luther University Halle-Wittenberg, 06108 Halle (Saale), Germany

<sup>8</sup> Department of Chemistry, Faculty of Science, Cairo University, Giza 12613, Egypt

<sup>9</sup> Department of Toxic and Narcotic Drug, Forensic Medicine, Mansoura Laboratory, Medicolegal Organization, Ministry of Justice, Cairo 11435, Egypt

\* Correspondence: sibrahim@kfu.edu.sa or dr\_saad\_chem@mans.edu.eg (S.S.); aly\_abdou@science.sohag.edu.eg (A.A.); tayousef@imamu.edu.sa (T.A.Y.)

## **Computational calculations**

### **DFT calculations**

The geometry of the study compounds was optimized with the use of the hybrid correlation functional (B3LYP) and the 6-311 (d, p) basis set, both of which were implemented in the Gaussian 09 software. The HOMO and LUMO energies were used to evaluate the following quantum chemical parameters: ionization potential (I.P.), electron affinity (E.A.), energy gap ( $\Delta E$ ), electronegativity ( $\chi$ ), chemical potential ( $\mu$ ), chemical hardness ( $\eta$ ), softness ( $\sigma$ ), electrophilicity index ( $\omega$ ), and nucleophilicity index (Nu).

### **Pharmacophore investigation**

Here, a database, as training set, was created from ten approved FDA drugs used in the treatment of COVID-19; Chloroquine, Cycloheximide, Emetine, Exalamide, Hycanthone, Lycorine, Promazin, Propranolol, Trilorene, and Zoxazolamine, Fig. (S1). The pharmacophore generation protocol was performed using the MOE 2015. The database compounds were undergoing energy minimization, and then undergo flexible alignments, and pharmacophore search. The ‘feature mapping’ protocol was run to detect common features in the database.

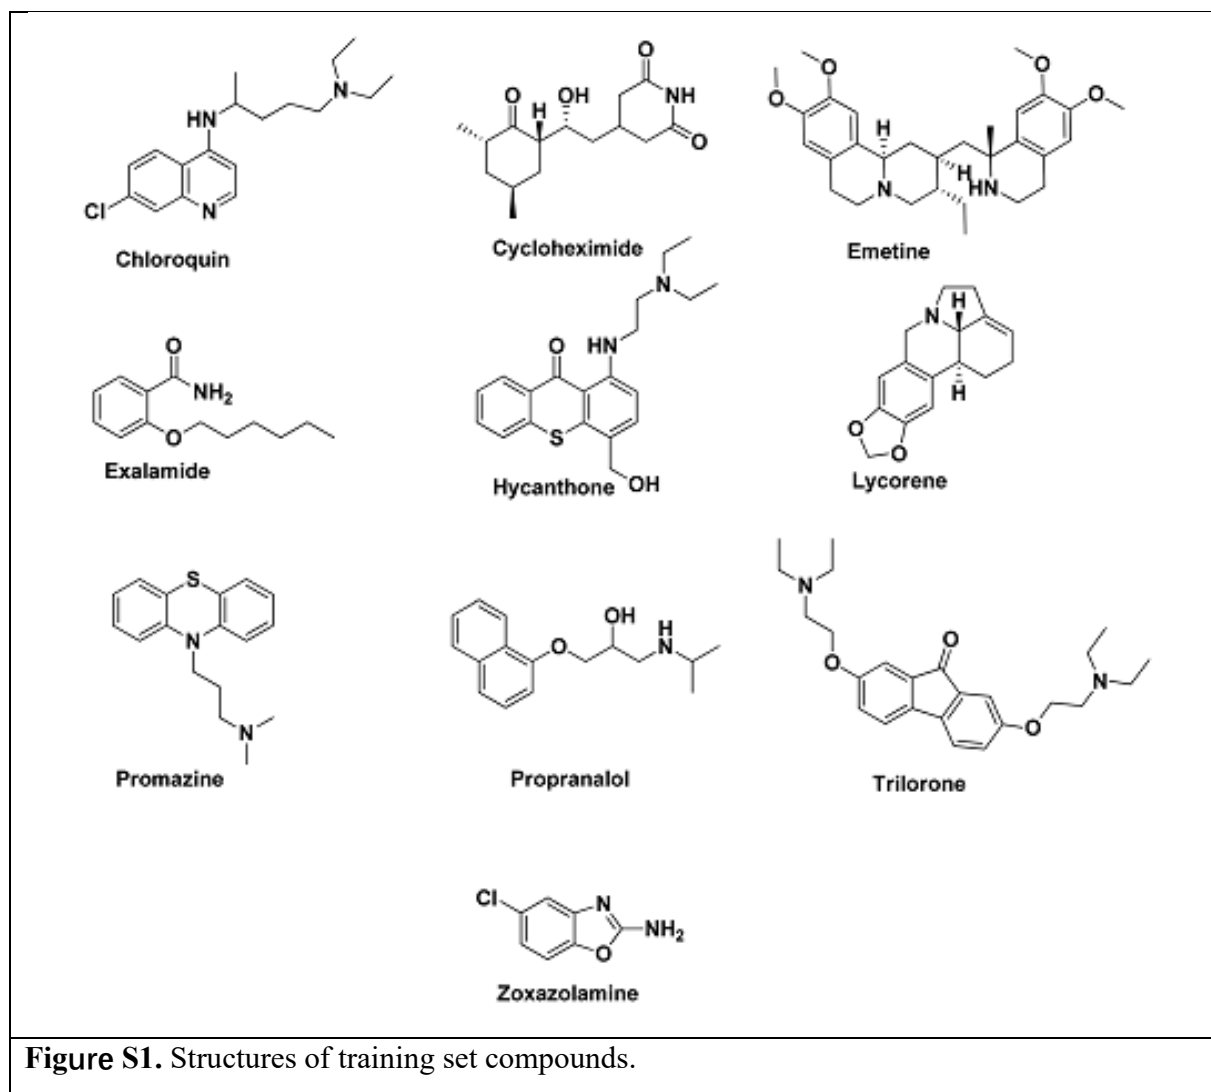

**Figure S1.** Structures of training set compounds.

### Molecular docking investigation

The chemicals referred to in the title were put to use as ligands (substrates) so that their capacity to bind to SARS-CoV-2 protease (PDB ID: 6LU7) could be investigated using the molecular docking method. The molecular orbital energy was then utilized to establish the compounds' therapeutic efficacy. In addition to this, this was carried out in order to ascertain the effectiveness of the compounds in question as antiviral agents.

A three-dimensional model of the target compounds was generated via the builder interface of the MOE software. After that, the target compounds were made into new databases, and protonate 3D, partial charges, and energy minimization were used in the ligand synthesis process.

After that, the obtained information was saved as an MDB file and included into the docking calculation.

The X-ray crystallographic structure of the SARS-CoV-2 protease, which has the PDB ID of 6LU7, was obtained from the Protein Data Bank database, which may be accessed at <http://www.rcsb.org>. The hydrogen atoms and partial charges are added to the protein with the protonate 3D application included in MOE. After that, the link between the atoms and the sort of atoms were examined, hydrogen atoms were added, the receptor was selected, and the potential of its atoms was set. The MOE Alpha Site Finder was used to conduct a search for the active site in the enzyme structure. The active site was modified to accommodate the residues that were bound to the receptor. Alpha spheres were acquired, and they were then put to use in the production of fake atoms.

The docking experiments were carried out so that the internal binding free energy of the inhibitor (target receptor) could be calculated (protein). In docking research, the scoring was done using a function called the London dG scoring function. Each docking experiment was composed of one hundred separate runs, each of which tried to get the greatest possible score. Docking patterns and interaction parameters were exported so that an inhibitory activity rating could be determined using a scoring system (S, kcal/mol) and an analysis of the interaction's features could be performed.

As prospective control ligands, the binding potential of chloroquine and hydroxychloroquine has been investigated and analyzed. The energy-efficient 3D structure of the ligands was created by converting the 2D structure of the ligands.

### **Drug likeness and ADMET prediction**

In the field of drug development, computer-based ADME evaluations are becoming more used. pkCSM and SwissADME were used to conduct ADMET (Absorption, Distribution, Metabolism, Excretion, and Toxicity) and drug-likeness prediction on drug candidate molecules. The properties of a drug's absorption (gastrointestinal absorption, bioavailability, water solubility (log S), Caco-2 and skin permeability), distribution (blood–brain barrier (BBB), central nervous system (CNS) permeability, the volume of distribution (VDss) unbound state), metabolism (various metabolic enzymes of Cytochromes P450 (CYP)), excretion (drug and renal clearance),



and toxicity (AMES, acute and chronic). In addition, these toxicological forecasts have been used in the application of the Lipinski rule as well as the bioavailability scores.

**Table S1.** Drug Likeness parameters .

|                        | <b>4a</b>               | <b>4b</b>               | <b>4c</b>              | <b>6a</b>            | <b>6b</b>            | <b>6c</b>            |
|------------------------|-------------------------|-------------------------|------------------------|----------------------|----------------------|----------------------|
| <b>MW</b>              | 554.35 g/mol            | 676.16 g/mol            | 608.37 g/mol           | 292.21 g/mol         | 340.28 g/mol         | 319.22 g/mol         |
| <b>logP</b>            | 4.7402                  | 5.987                   | 3.2784                 | 2.9539               | 3.6736               | 2.723                |
| <b>n<sub>Rot</sub></b> | 7                       | 7                       | 9                      | 3                    | 3                    | 4                    |
| <b>nHBA</b>            | 4                       | 2                       | 6                      | 2                    | 2                    | 3                    |
| <b>nHBD</b>            | 0                       | 0                       | 0                      | 0                    | 1                    | 0                    |
| <b>Lipinski rule</b>   | 1 violations:<br>MW>500 | 1 violations:<br>MW>500 | 1 violation:<br>MW>500 | 0<br>violation       | 0<br>violation       | 0<br>violation       |
| <b>ABS</b>             | 0.17                    | 0.17                    | 0.55                   | 0.55                 | 0.55                 | 0.55                 |
| <b>Log S</b>           | -6.66                   | -7.88                   | -8.02                  | -3.77                | -5.03                | -4.46                |
| <b>GI</b>              | High                    | High                    | Low                    | High                 | High                 | High                 |
| <b>Pgp</b>             | Yes                     | Yes                     | Yes                    | No                   | No                   | Yes                  |
| <b>BBB</b>             | Yes                     | No                      | No                     | Yes                  | Yes                  | Yes                  |
| <b>TPSA</b>            | 24.72 Å <sup>2</sup>    | 24.72 Å <sup>2</sup>    | 116.36 Å <sup>2</sup>  | 12.36 Å <sup>2</sup> | 32.59 Å <sup>2</sup> | 58.18 Å <sup>2</sup> |
| <b>LogKp</b>           | -5.17 cm/s              | -5.08 cm/s              | -5.89 cm/s             | -5.37 cm/s           | -5.10 cm/s           | -5.73 cm/s           |
| <b>SA</b>              | 3.53                    | 3.63                    | 3.91                   | 2.69                 | 2.96                 | 3.02                 |

**n<sub>Rot</sub>**: number of rotatable bonds; **MW**: molecular weight; **nHBD**: number of hydrogen bond donors; **HBA**: number of hydrogen bond acceptors; **logP**: n-octanol/water partition coefficient; **S.A.**: synthetic accessibility; **BBB**: blood-brain barrier; **TPSA**: topological polar surface area; **G.I.**: gastrointestinal absorption; **Pgp**: P-glycoprotein substrate; **ABS**: Abbot Bioavailability Score; **LogKp**: skin permeation (cm/s).

**Table S2.**ADMET properties using pkCSM web server.

|                     |                                   | 4a     | 4b     | 4c     | 6a     | 6b     | 6c     |
|---------------------|-----------------------------------|--------|--------|--------|--------|--------|--------|
| <b>Absorption</b>   | Water solubility                  | -6.711 | -7.007 | -5.58  | -4.191 | -4.9   | -4.312 |
|                     | Skin Permeability                 | -2.729 | -2.732 | -2.735 | -1.921 | -2.458 | -2.533 |
|                     | Intestinal absorption (human)     | 98.292 | 96.217 | 95.231 | 97.555 | 96.062 | 95.931 |
|                     | Caco2 permeability                | 1.121  | 1.023  | 0.615  | 1.336  | 1.61   | 1.321  |
|                     | P-glycoprotein substrate          | Yes    | Yes    | Yes    | No     | Yes    | Yes    |
|                     | P-glycoprotein I inhibitor        | Yes    | Yes    | Yes    | No     | No     | No     |
|                     | P-glycoprotein II inhibitor       | Yes    | Yes    | Yes    | No     | No     | No     |
| <b>Distribution</b> | VDss (human)                      | -0.353 | 0.071  | -0.546 | 0.444  | 0.428  | 0.503  |
|                     | Fraction unbound (human)          | 0.209  | 0.134  | 0.182  | 0.113  | 0.068  | 0.008  |
|                     | BBB permeability                  | 0.856  | 0.721  | -1.136 | 0.756  | 0.19   | -0.186 |
|                     | CNS permeability                  | -0.846 | -0.767 | -2.182 | -1.371 | -1.478 | -2.095 |
| <b>Metabolism</b>   | CYP1A2 inhibitor                  | Yes    | Yes    | No     | Yes    | Yes    | Yes    |
|                     | CYP3A4 substrate                  | Yes    | Yes    | Yes    | Yes    | Yes    | Yes    |
|                     | CYP3A4 inhibitor                  | Yes    | Yes    | Yes    | No     | No     | No     |
|                     | CYP2D6 substrate                  | No     | No     | No     | No     | No     | No     |
|                     | CYP2D6 inhibitor                  | No     | No     | No     | No     | No     | No     |
|                     | CYP2C9 inhibitor                  | Yes    | No     | No     | Yes    | Yes    | Yes    |
|                     | CYP2C19 inhibitor                 | Yes    | No     | No     | Yes    | Yes    | Yes    |
| <b>Excretion</b>    | Total Clearance                   | 2.2    | -0.142 | 2.548  | 1.498  | 1.777  | 1.684  |
|                     | Renal OCT2 substrate              | No     | No     | No     | No     | No     | No     |
| <b>Toxicity</b>     | hERG I inhibitor                  | No     | No     | No     | No     | No     | No     |
|                     | hERG II inhibitor                 | Yes    | Yes    | Yes    | No     | Yes    | No     |
|                     | Max. tolerated dose (human)       | 0.598  | 0.398  | 0.345  | 0.659  | 0.33   | 0.364  |
|                     | AMES toxicity                     | No     | No     | Yes    | Yes    | Yes    | Yes    |
|                     | Oral Rat Acute Toxicity (LD50)    | 2.992  | 2.737  | 3.078  | 1.956  | 2.121  | 2.33   |
|                     | Oral Rat Chronic Toxicity (LOAEL) | 2.435  | 1.013  | 1.687  | 0.757  | 0.467  | 1.378  |
|                     | <i>T.Pyriformis</i> toxicity      | 0.293  | 0.301  | 0.286  | 2.053  | 1.213  | 1.76   |
|                     | Hepatotoxicity                    | Yes    | No     | No     | No     | No     | No     |
|                     | Skin Sensitisation                | No     | No     | No     | No     | No     | No     |
|                     | Minnow toxicity                   | -0.931 | -1.681 | -2.51  | 0.415  | -0.088 | -0.195 |

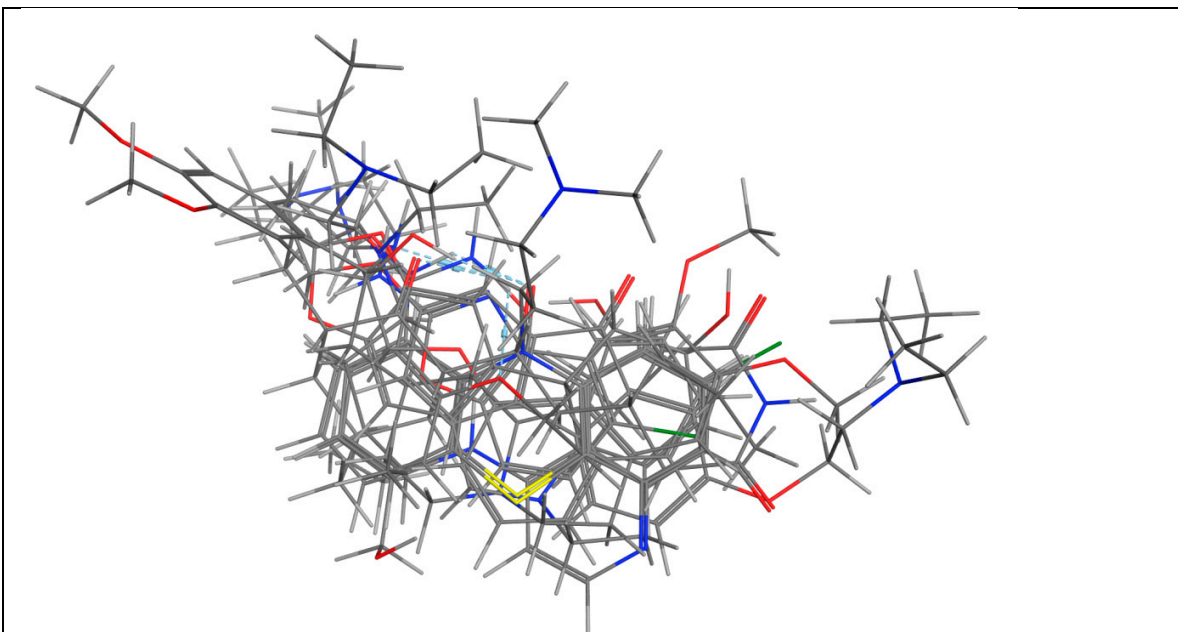

Figure S2. Alignment of ten approved FDA drugs (Chloroquine, Cycloheximide, Emetine, Exalamide, Hycanthone, Lycorine, Promazin, Propranolol, Trilorene, and Zoxazolamine) from the training set, carbon atoms are in gray, oxygen atoms are in red, nitrogen atom in blue.

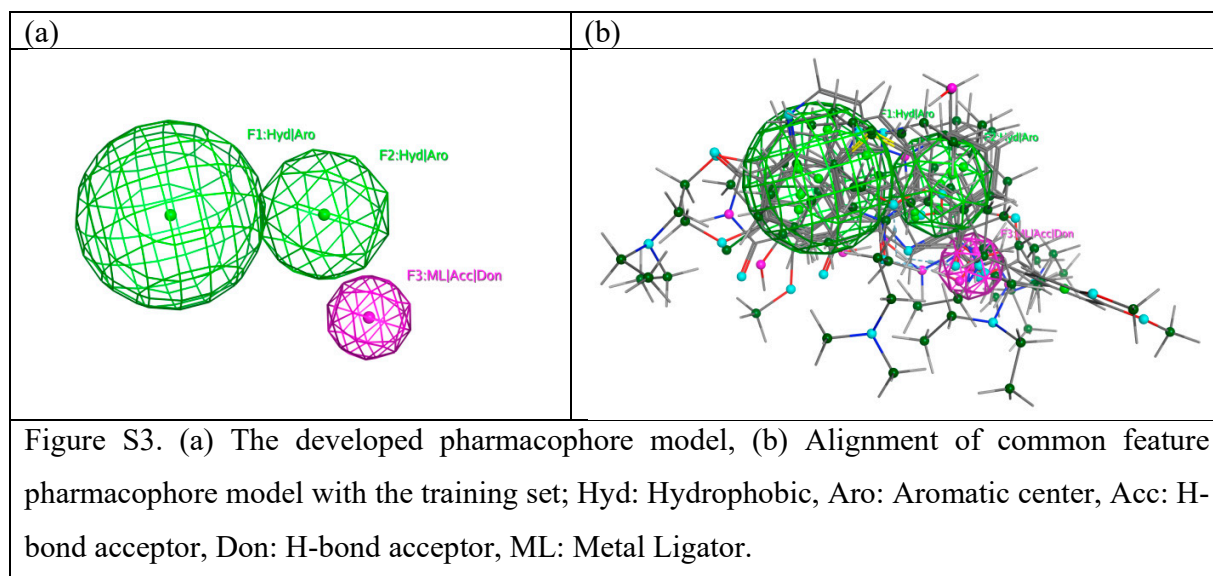

### Synthesis of the organoselenium compounds

4-Selenocyanatoaniline (2), 4,4'-diselanediyldianiline (3), and 4-(methylselanyl)aniline (5) were prepared from aniline employing the modified literature method. Briefly, 4-(methylselanyl)aniline (5) was prepared in 57 % yield from 4,4'-diselanediyldianiline (3) (2 mmol), methyl iodide (4.4 mmol), NaOH (2 mol), and NaBH<sub>4</sub> (50 mmol) in MeOH (30 mL). The reaction continued at RT for approximately 2 hr. The reaction was extracted using CH<sub>2</sub>Cl<sub>2</sub> and removed under vacuum to give a brown oil in 91 % yield.

4-Selenocyanatoaniline (2) was obtained as a yellow solid (88 % yield). Mp: 73–74 °C. <sup>1</sup>H NMR (400 MHz, CDCl<sub>3</sub>)  $\delta$  7.44 (d,  $J$  = 8.4 Hz, 2H, Ar-H), 6.64 (d,  $J$  = 8.4 Hz, 2H, Ar-H), 3.95 (s, 2H, NH<sub>2</sub>).

4,4'-Diselanediyldianiline (3) was obtained as pale-yellow crystals (82 % yield. Mp: 78–80 °C. <sup>1</sup>H NMR (400 MHz, CDCl<sub>3</sub>)  $\delta$  7.3 (m, 4H, Ar-H), 6.5 (m, 4H, Ar-H), 3.7 ppm (s, 4H, NH<sub>2</sub>).

4-(Methylselanyl)aniline (4) was synthesized as a brown oil (91 % yield). <sup>1</sup>H NMR (400 MHz, CDCl<sub>3</sub>)  $\delta$  7.31 (d,  $J$  = 9.0 Hz, 2H, Ar-H), 6.61 (d,  $J$  = 9.0 Hz, 2H, Ar-H), 3.72 (br s, 2H, NH<sub>2</sub>), 2.66 (s, 3H, CH<sub>3</sub>).

**Copies of the  $^1\text{H}$ -NMR &  $^{13}\text{C}$ -NMR, IR, and MS spectra of the organoselenium compounds**

*N,N'*-(diselanediyldis(4,1-phenylene))bis(1-(4-fluorophenyl)methanimine) (**4a**)

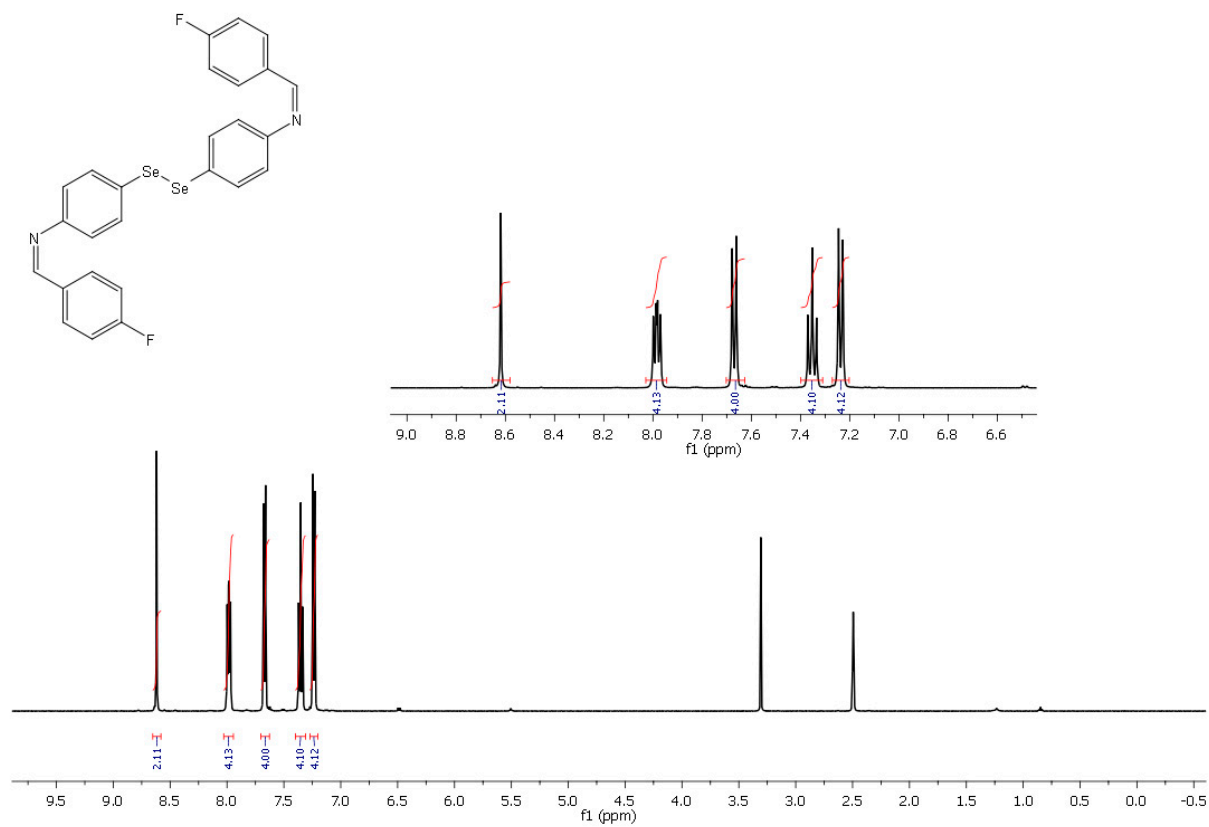

$^1\text{H}$ NMR chart of compound **4a**

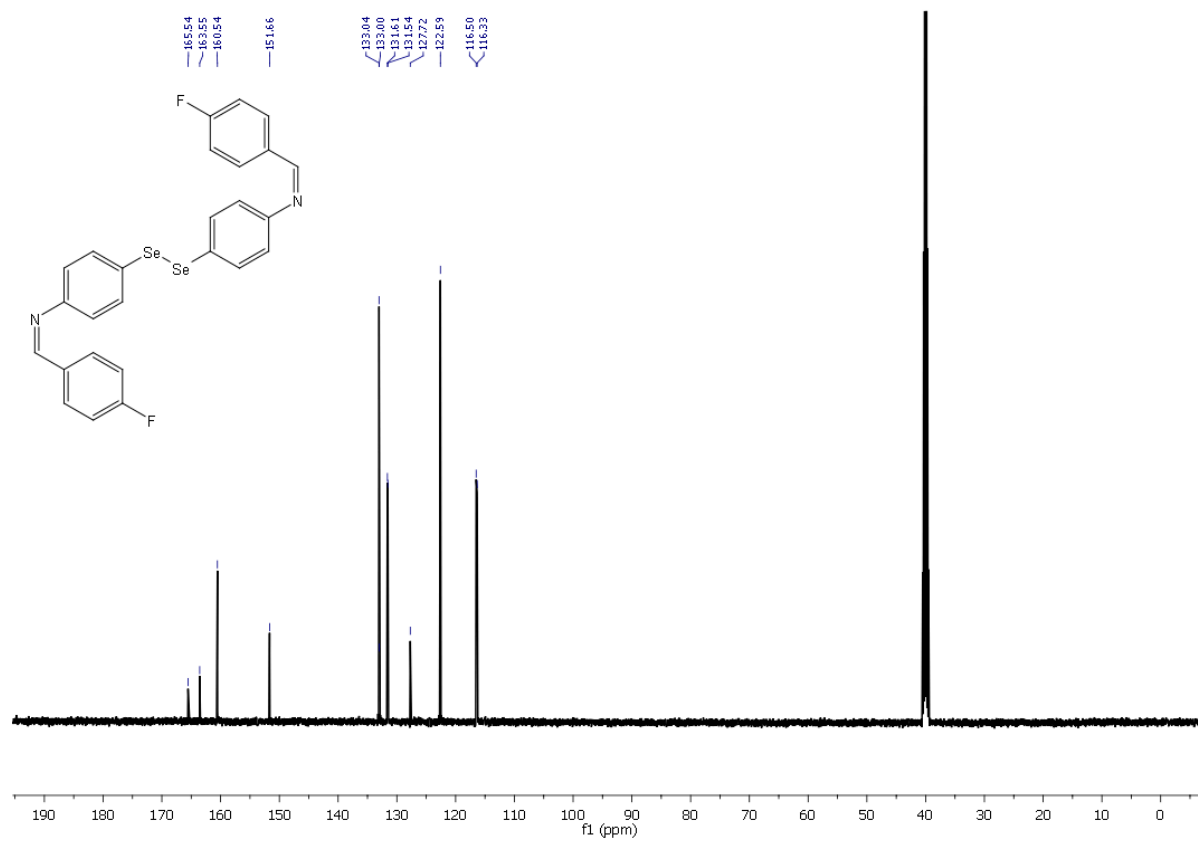

$^{13}\text{C}$ NMR chart of compound**4a**

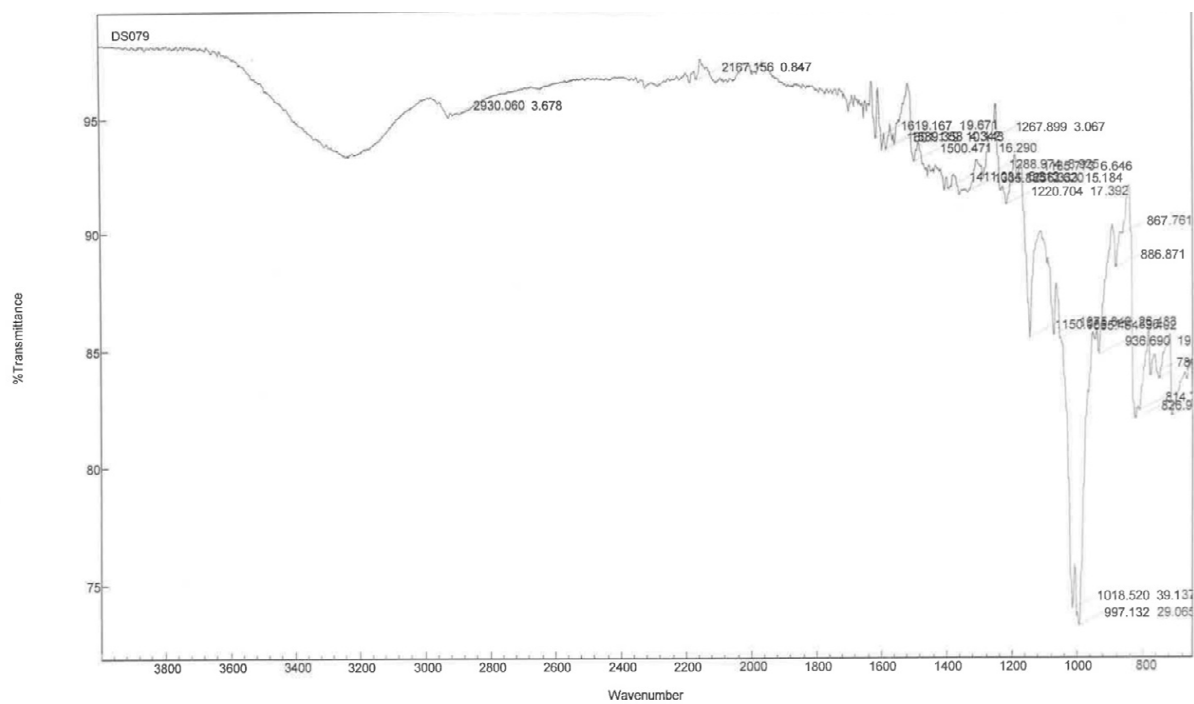

IR chart of compound **4a**



Spectrum RT 0:57 - 1:26 (64 scans) - Background Subtracted 0 - 0:52  
Alaasar\_DS079-2\_Scan2\_is2.datx 2023.03.01 15:26:16 ;  
ESI - Max: 9.4E5

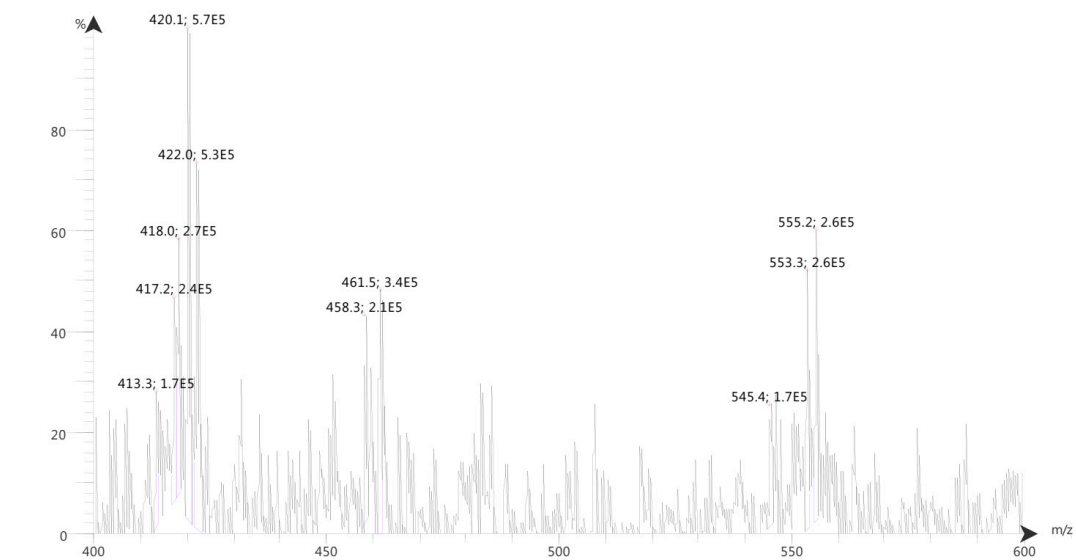

MS chart of compound **4a**

*N,N'*-(diselanediylbis(4,1-phenylene))bis(1-(4-bromophenyl)methanimine) (**4b**)

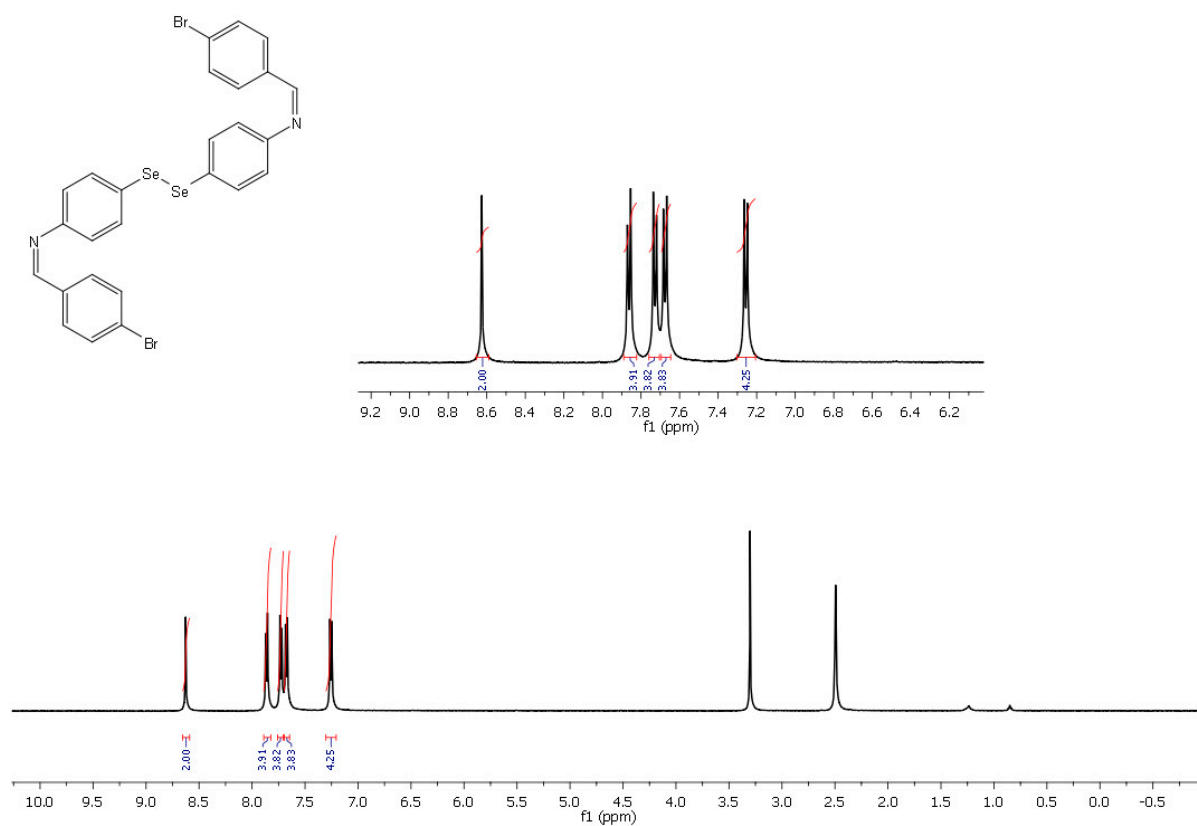

<sup>1</sup>H NMR chart of compound **4b**

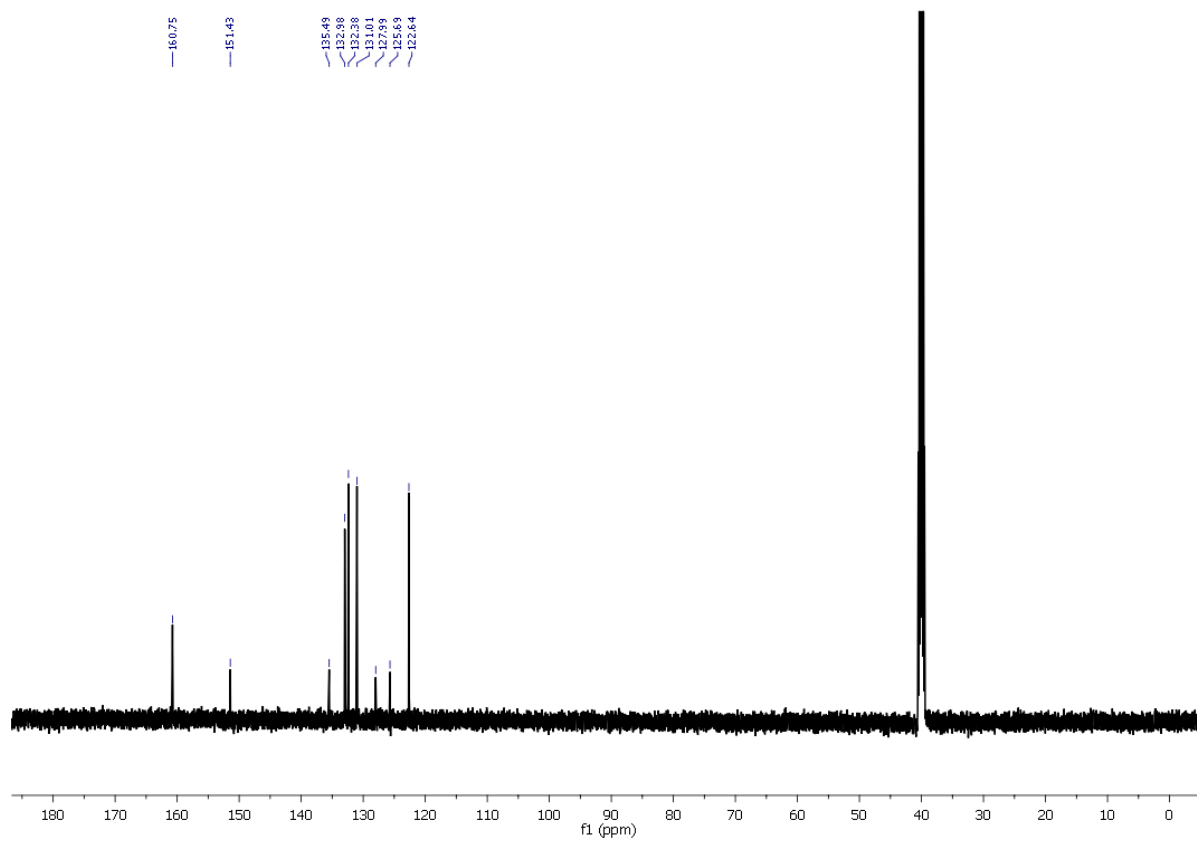

$^{13}\text{C}$ NMR chart of compound **4b**

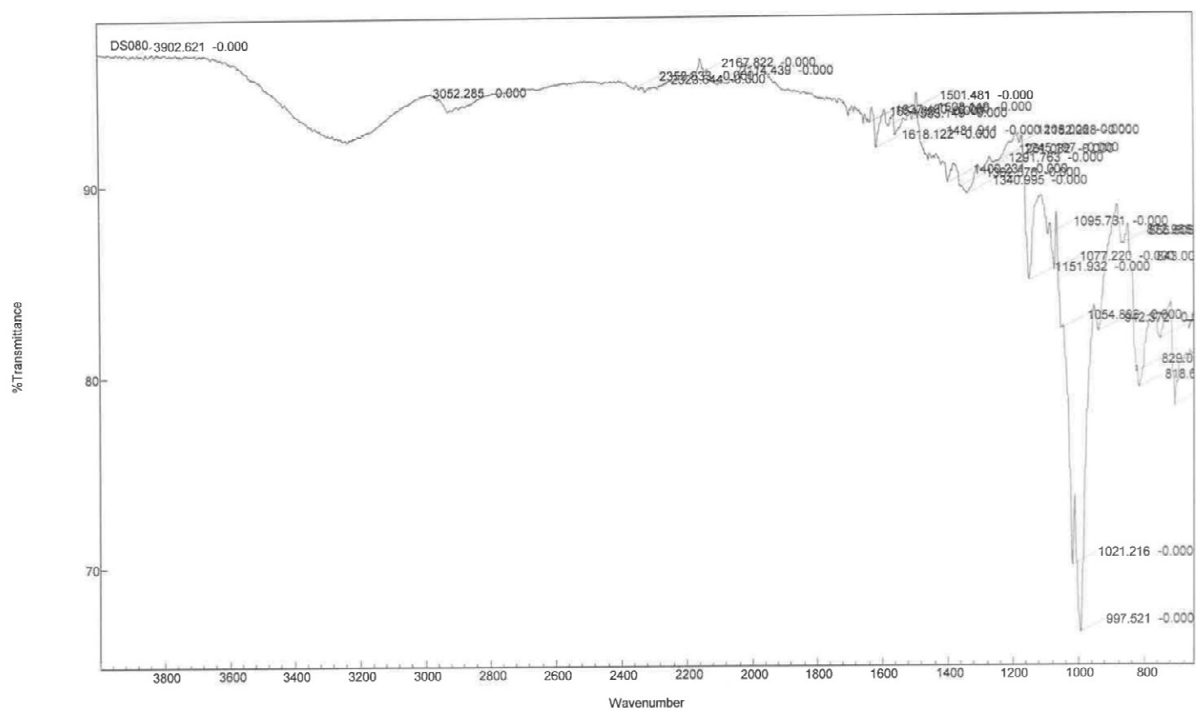

IR chart of compound **4b**

Spectrum RT 1:00 - 1:40 (90 scans) - Background Subtracted 0 - 0:57  
Alaasar\_DS080-2\_Scan2\_is2.datx 2023.03.02 08:03:22 ;  
ESI - Max: 9.4E5

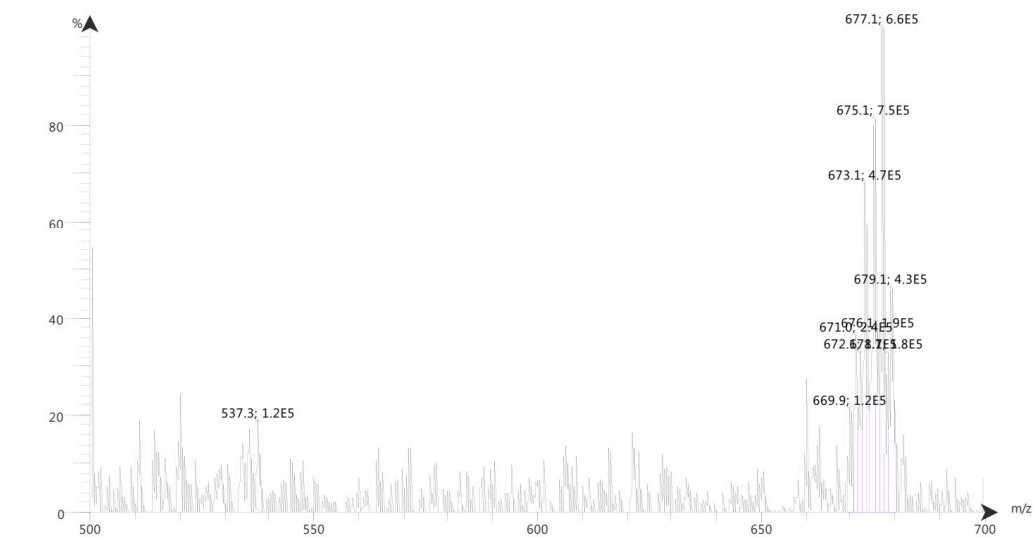

MS chart of compound **4b**

*N,N'*-(diselanyldiylbis(4,1-phenylene))bis(1-(2-nitrophenyl)methanimine) (**4c**)

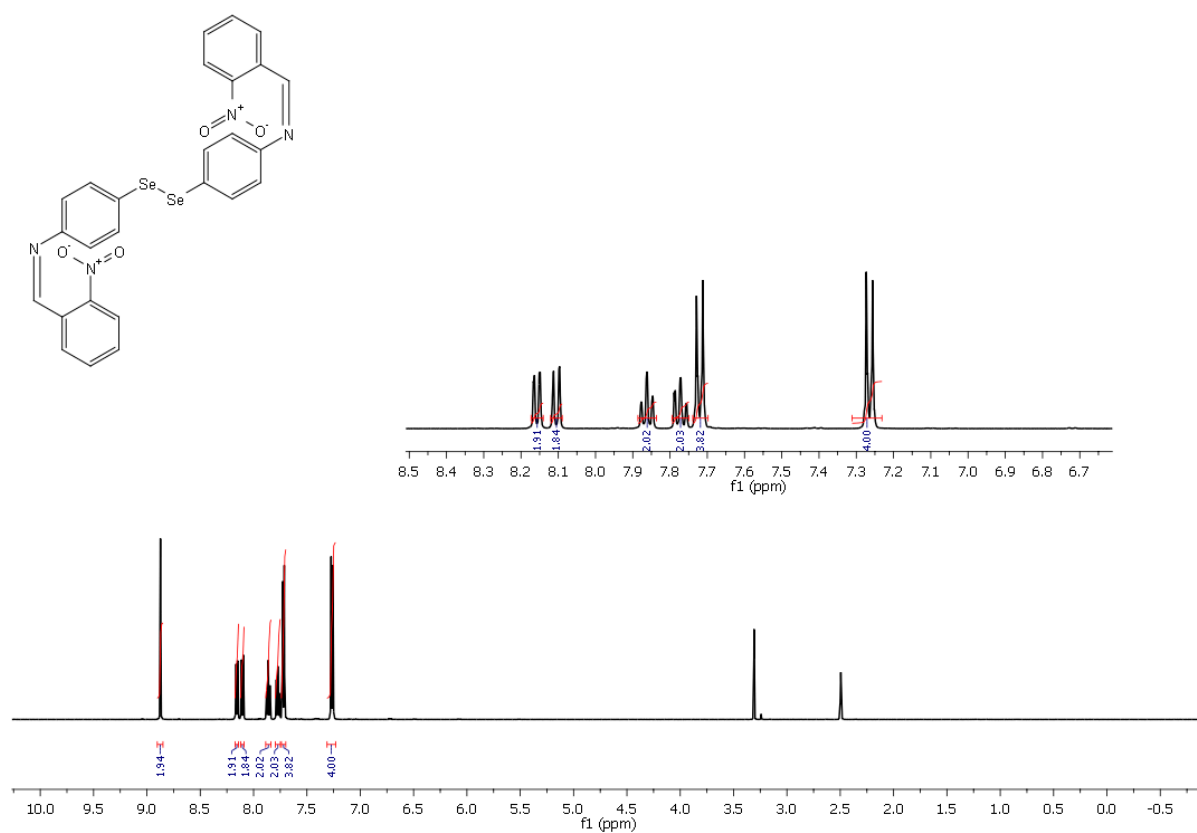

HNMR chart of compound **4c**

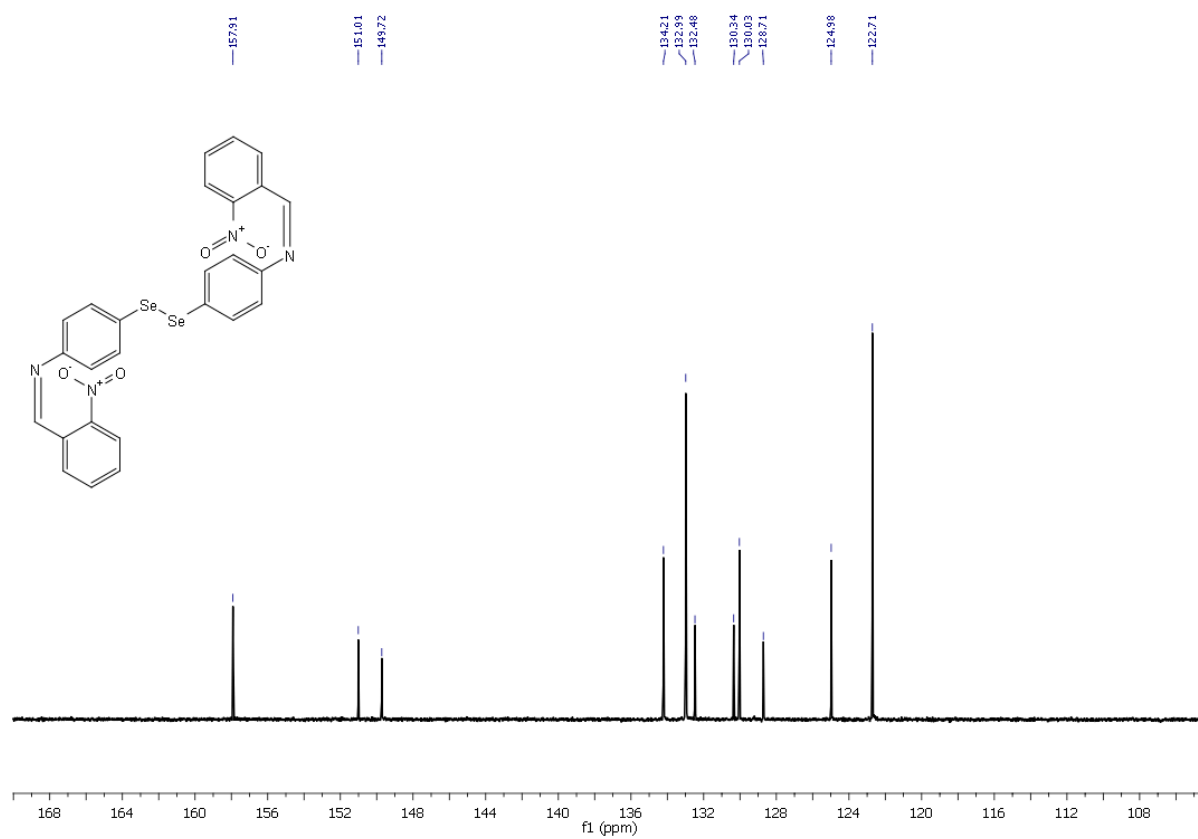

$^{13}\text{C}$ NMR chart of compound **4c**

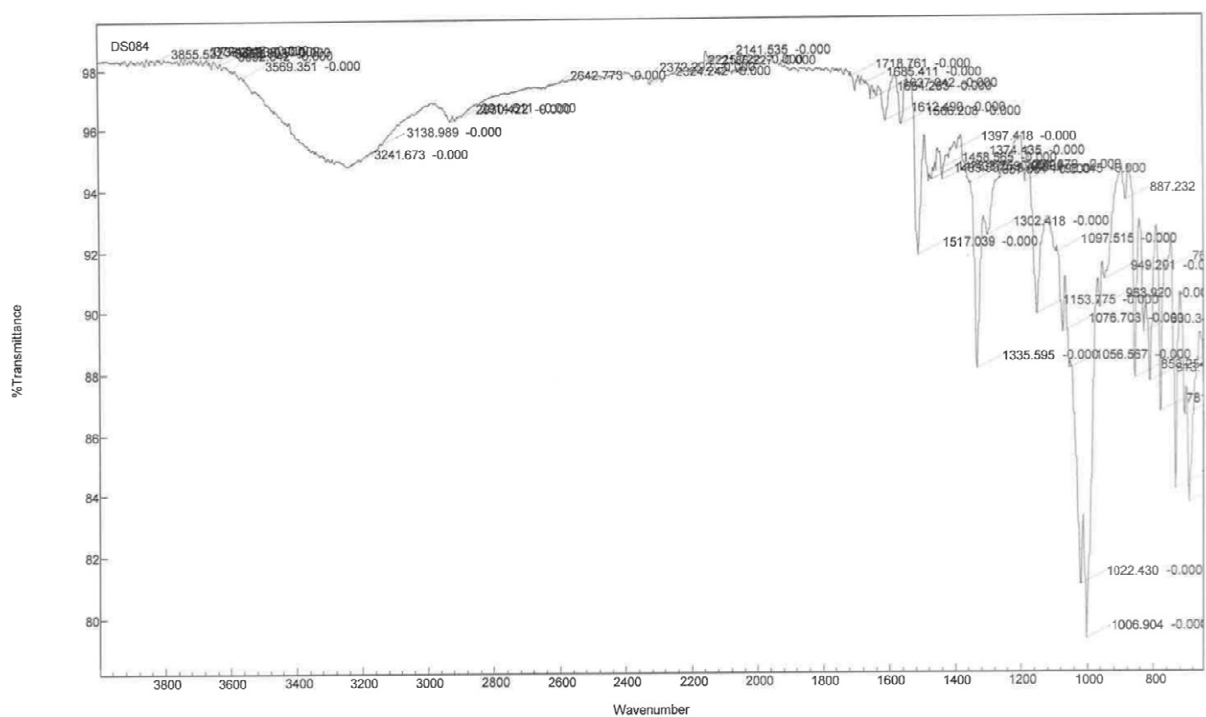

IR chart of compound 4c



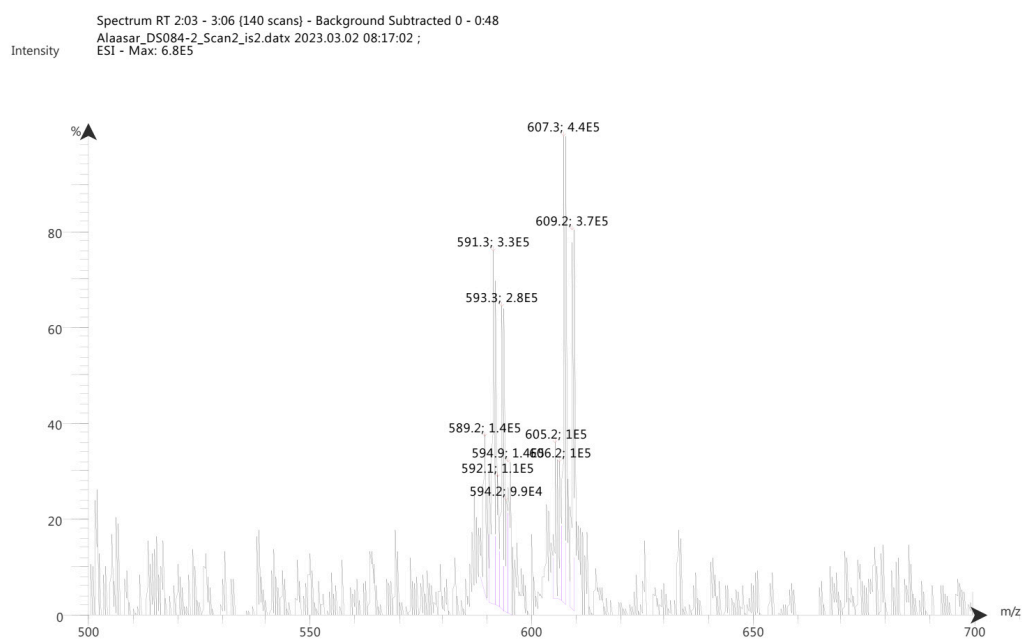

MS chart of compound **4c**

Spectrum RT 0:45 - 1:47 (137 scans) - Background Subtracted 0 - 0:41  
Alaasar\_DS084-2\_Scan1\_is1.datx 2023.03.02 08:17:02 ;  
ESI + Max: 1.6E6

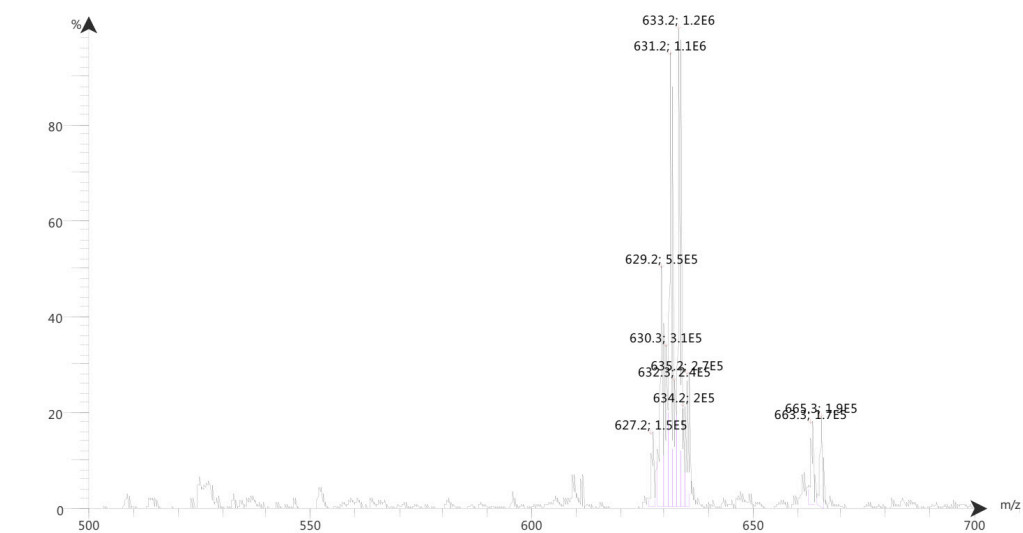

MS chart of compound **4c**

*1-(4-fluorophenyl)-N-(4-(methylselanyl)phenyl)methanimine (6a)*

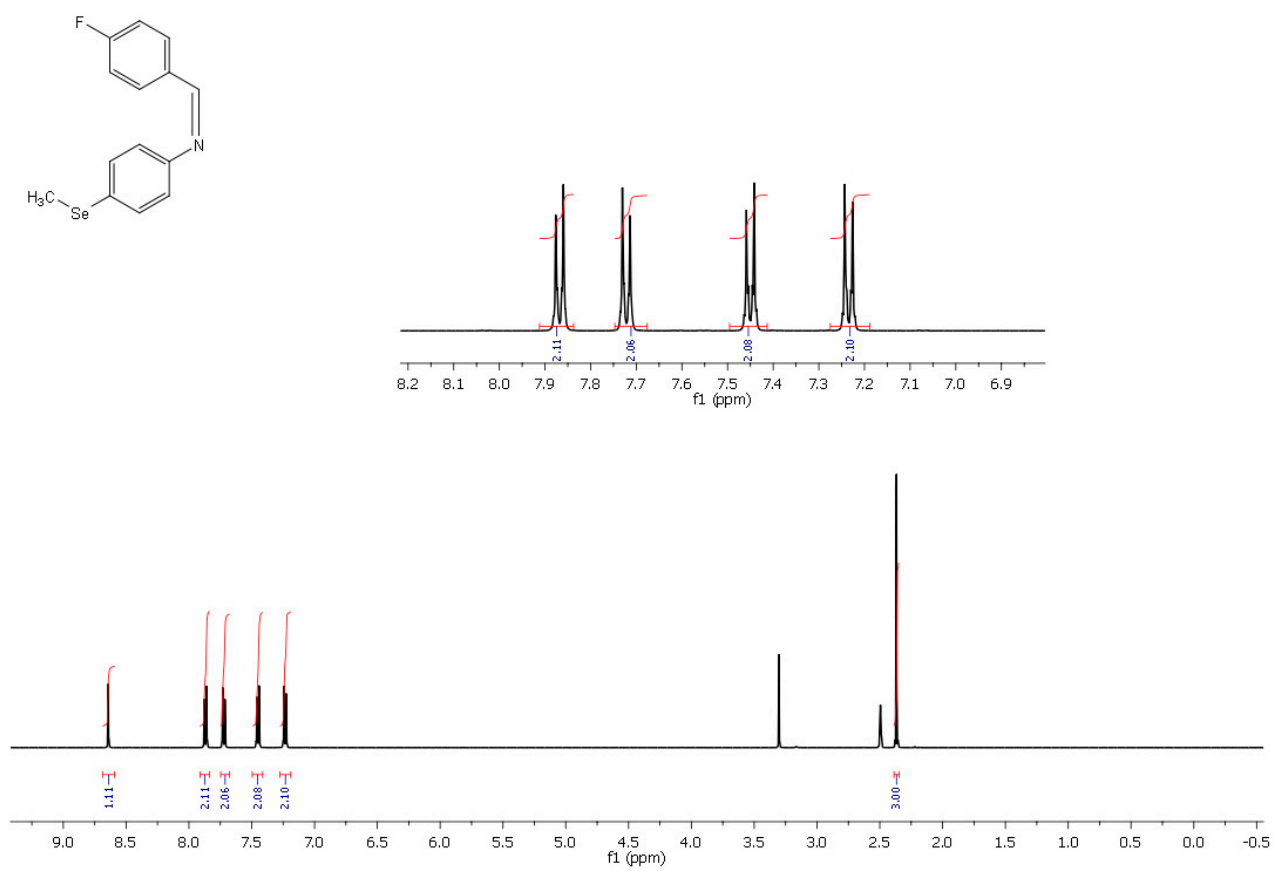

<sup>1</sup>H NMR chart of compound **6a**

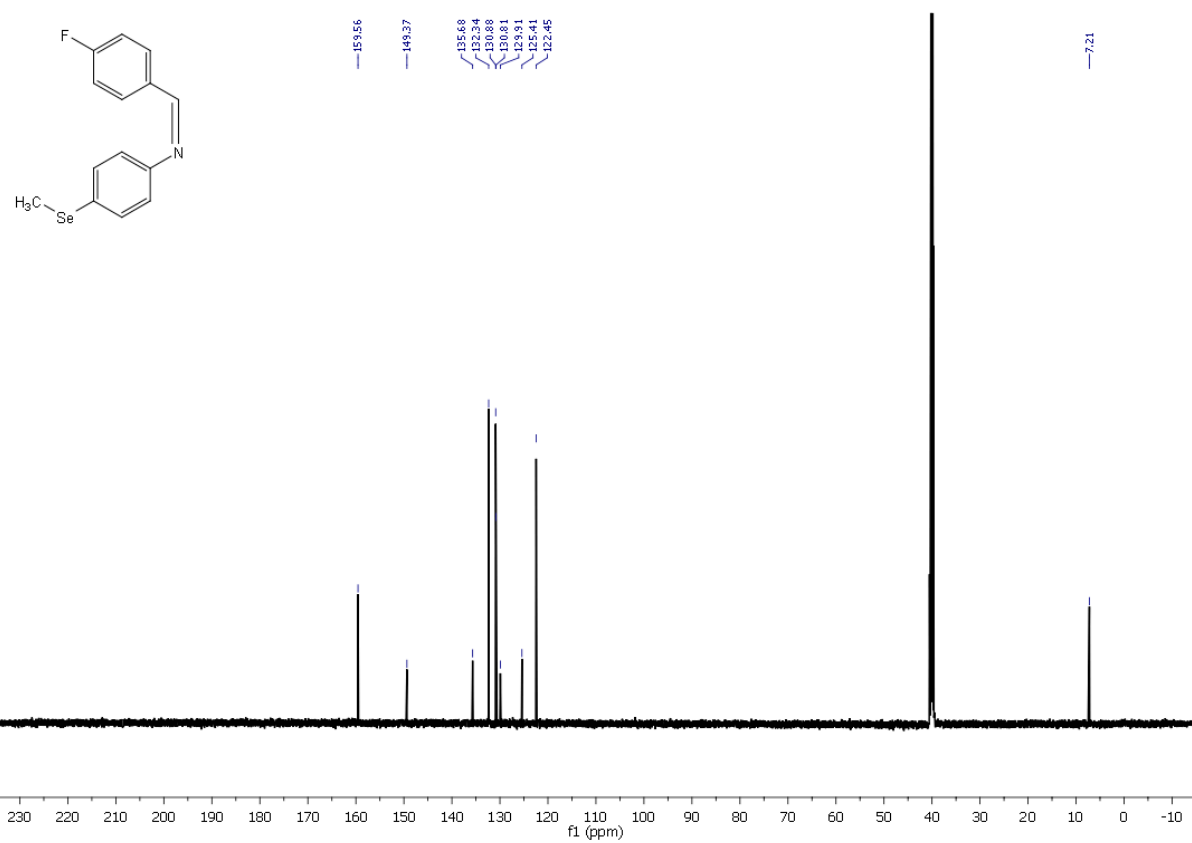

$^{13}\text{C}$ NMR chart of compound 6a

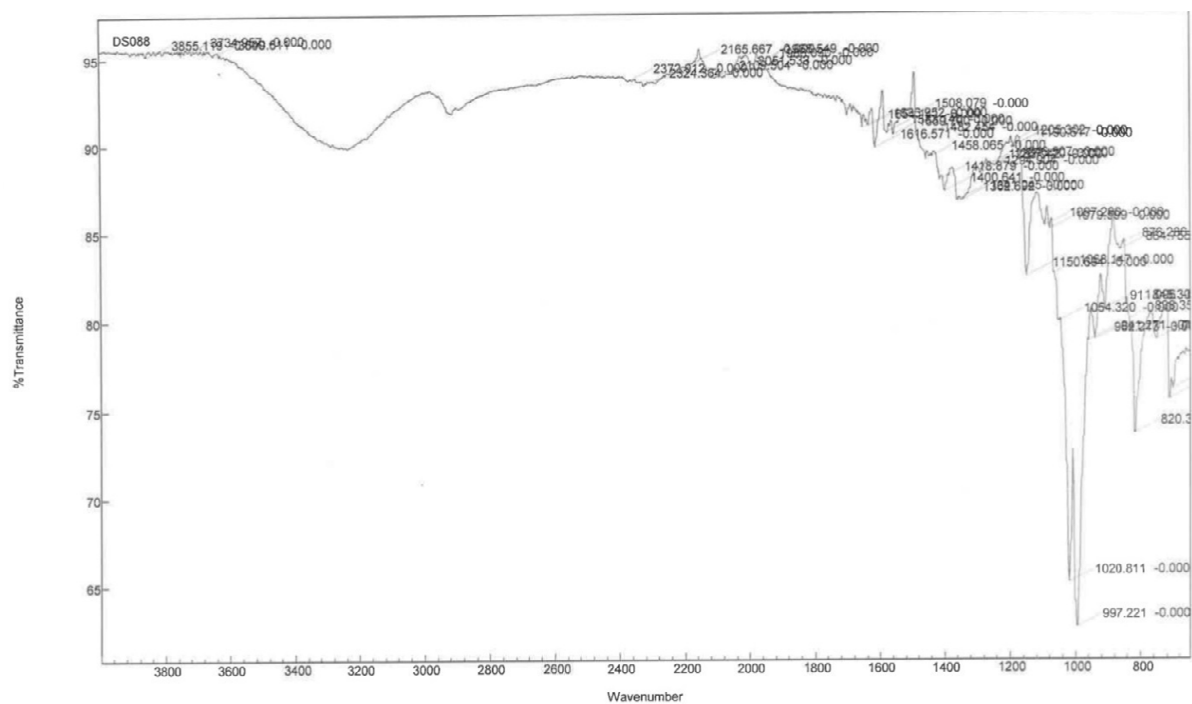

IR chart of compound 6a

Spectrum RT 0:59 - 1:30 (69 scans) - Background Subtracted 0 - 0:55  
Alaasar\_DS088-2\_Scan2.js2.datx 2023.03.02 08:30:36 ;  
ESI - Max: 1.7E6

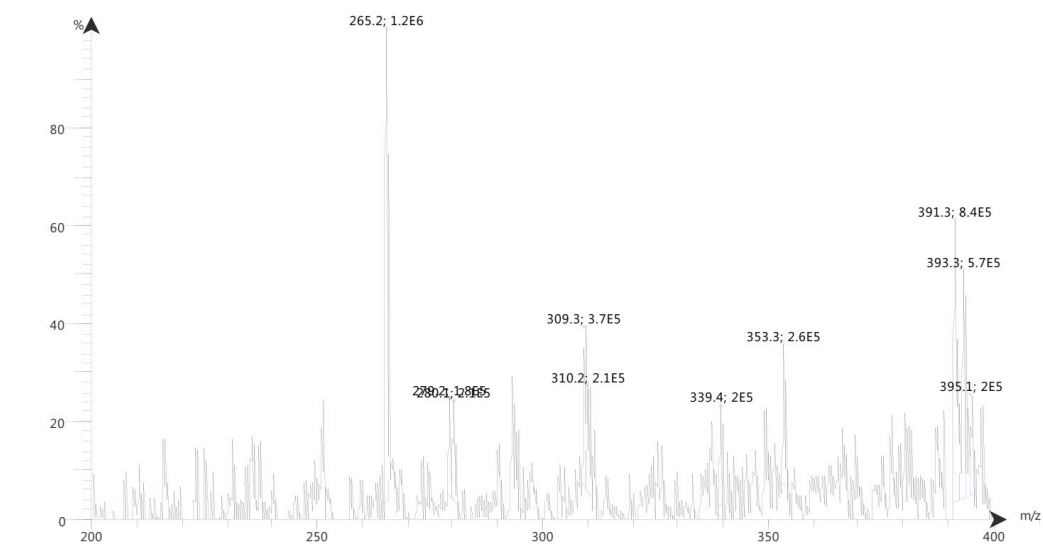

MS chart of compound 6a

*1-(((4-(methylselanyl)phenyl)imino)methyl)naphthalen-2-ol (6b)*

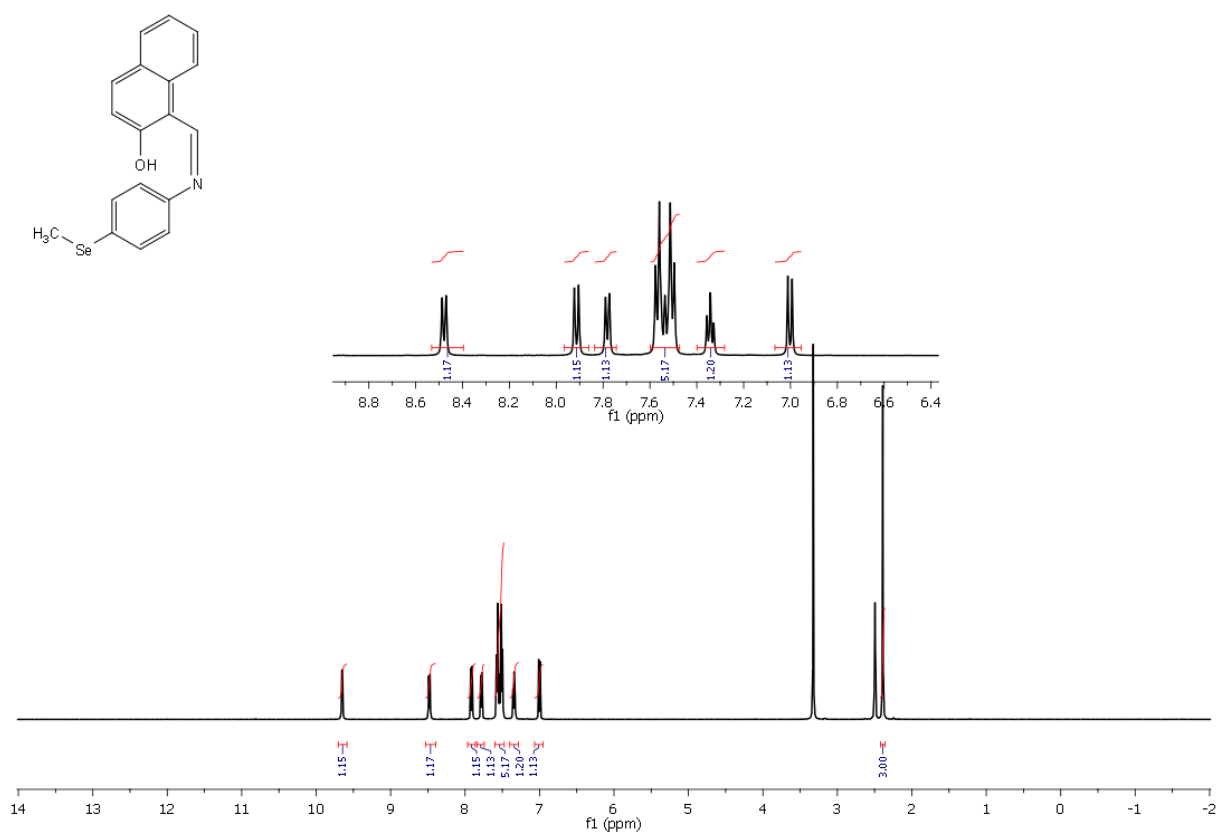

<sup>1</sup>H NMR chart of compound **6b**

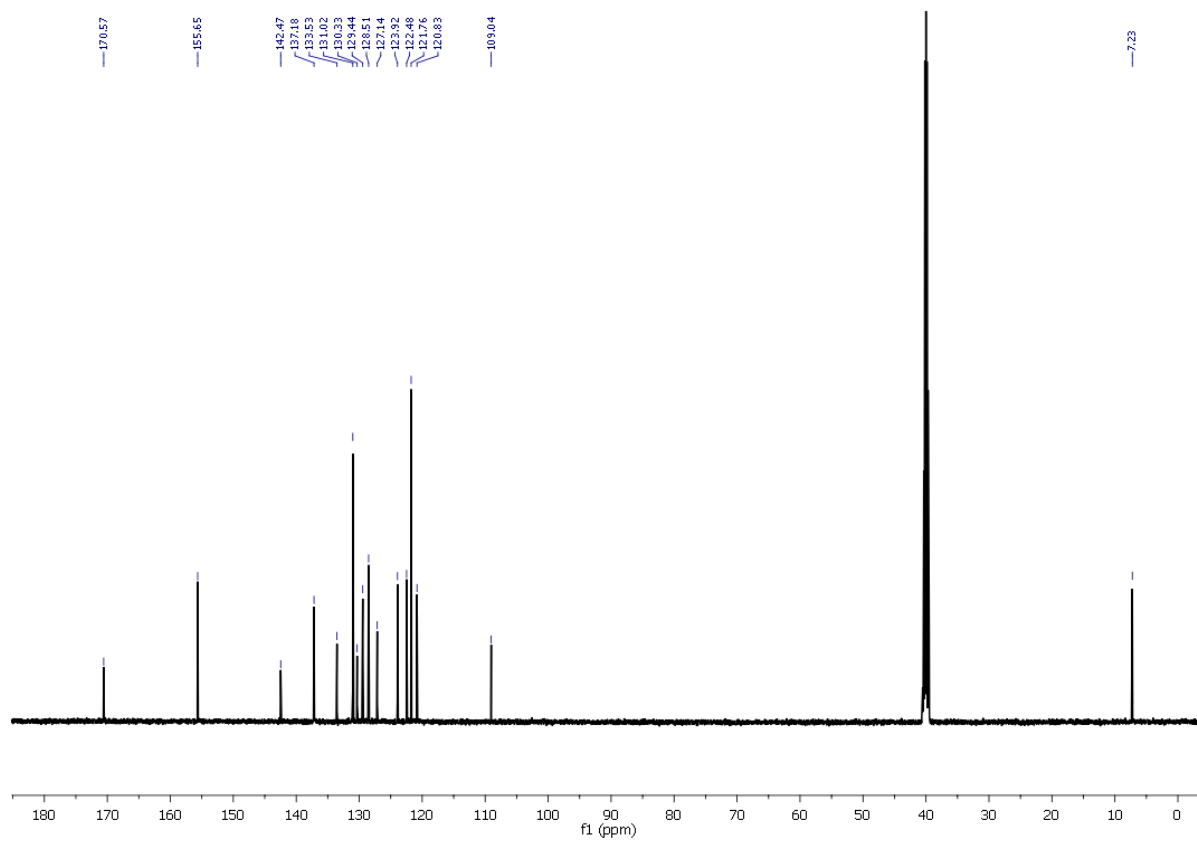

$^{13}\text{C}$ NMR chart of compound**6b**





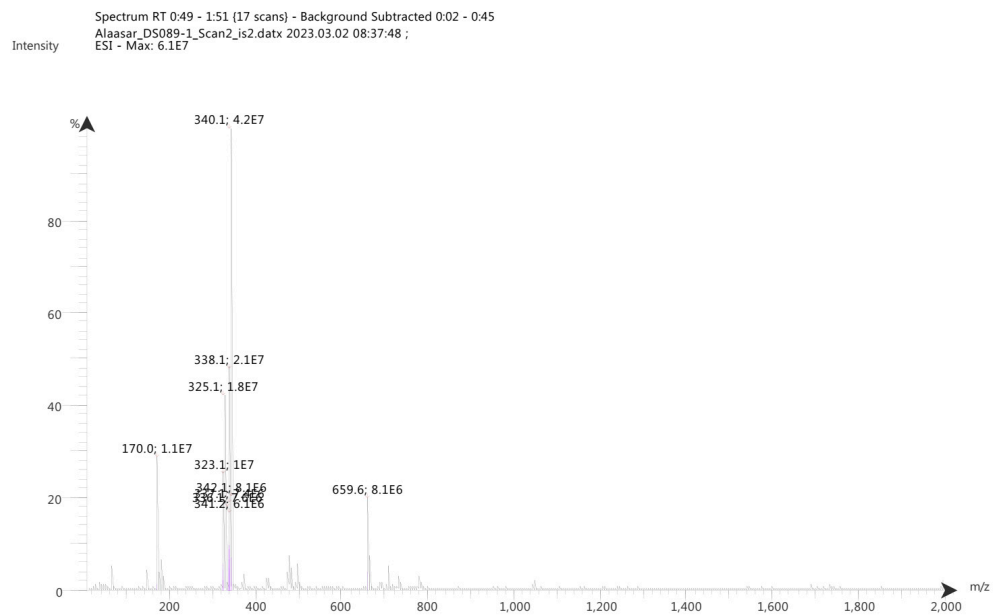

MS chart of compound **6b**

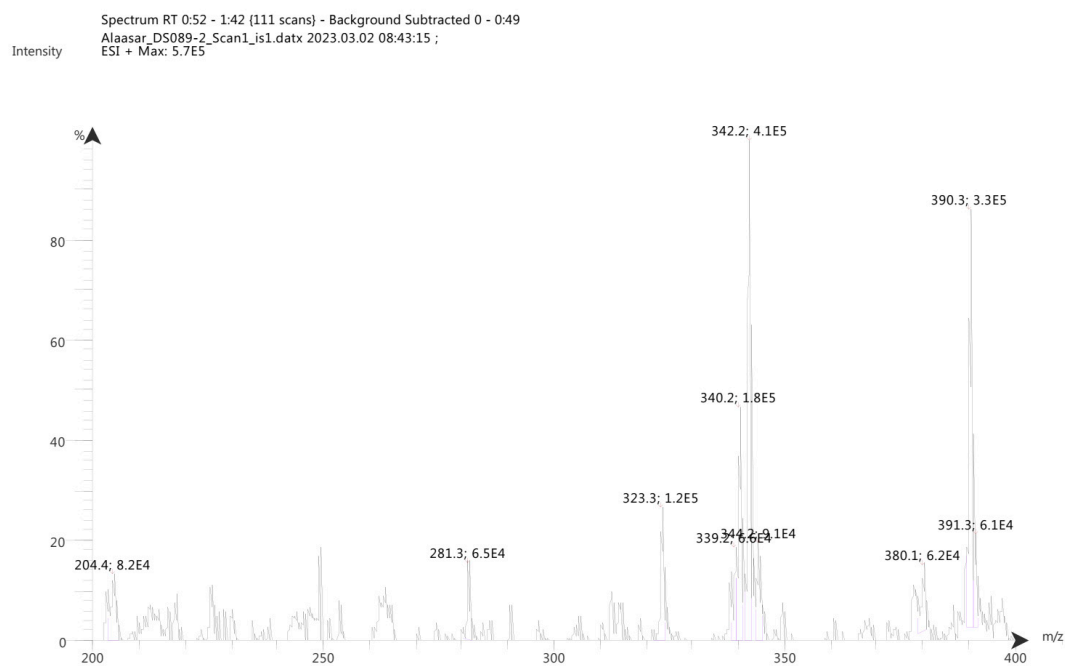

MS chart of compound **6b**

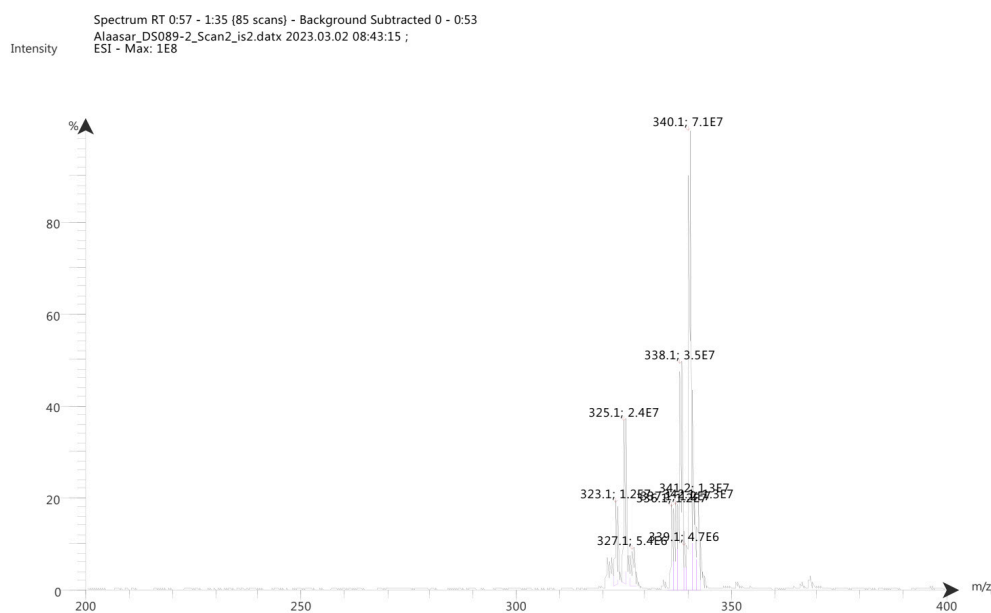

MS chart of compound **6b**

*N*-(4-(methylselanyl)phenyl)-1-(2-nitrophenyl)methanimine (**6c**)

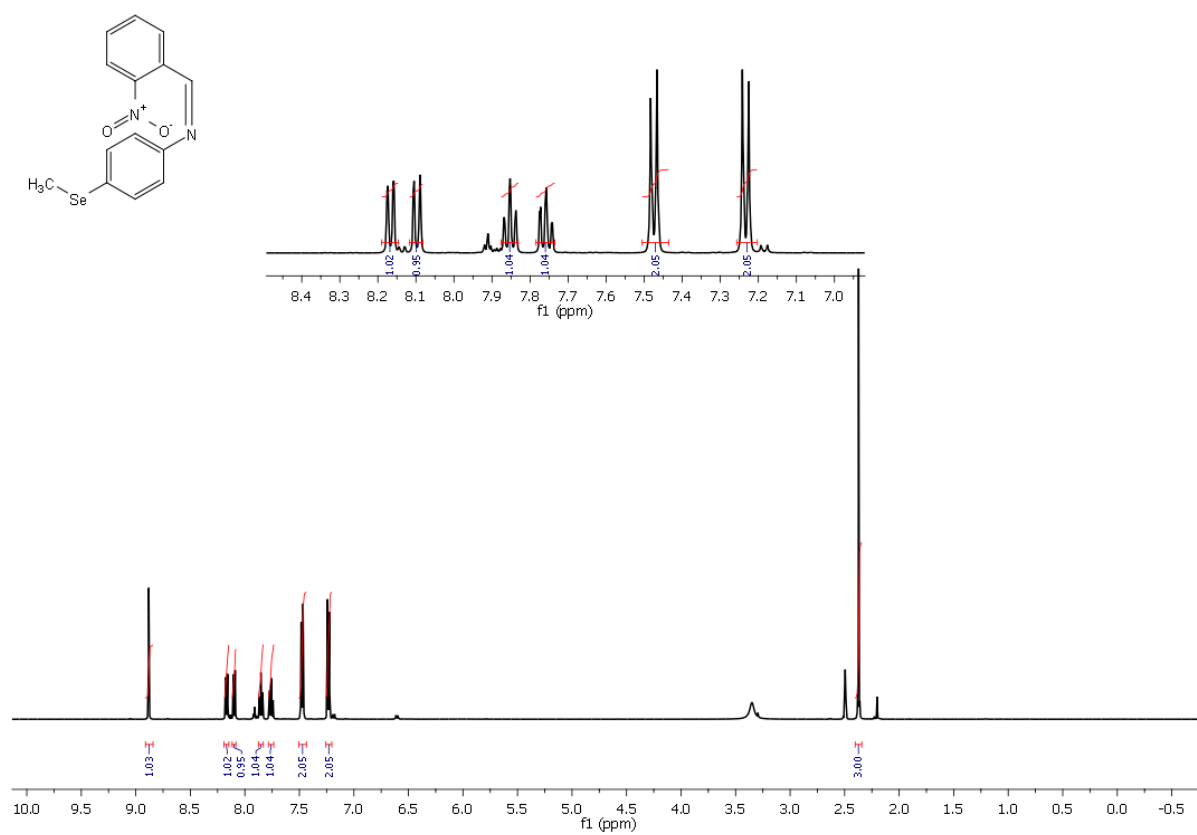

<sup>1</sup>H NMR chart of compound **6c**

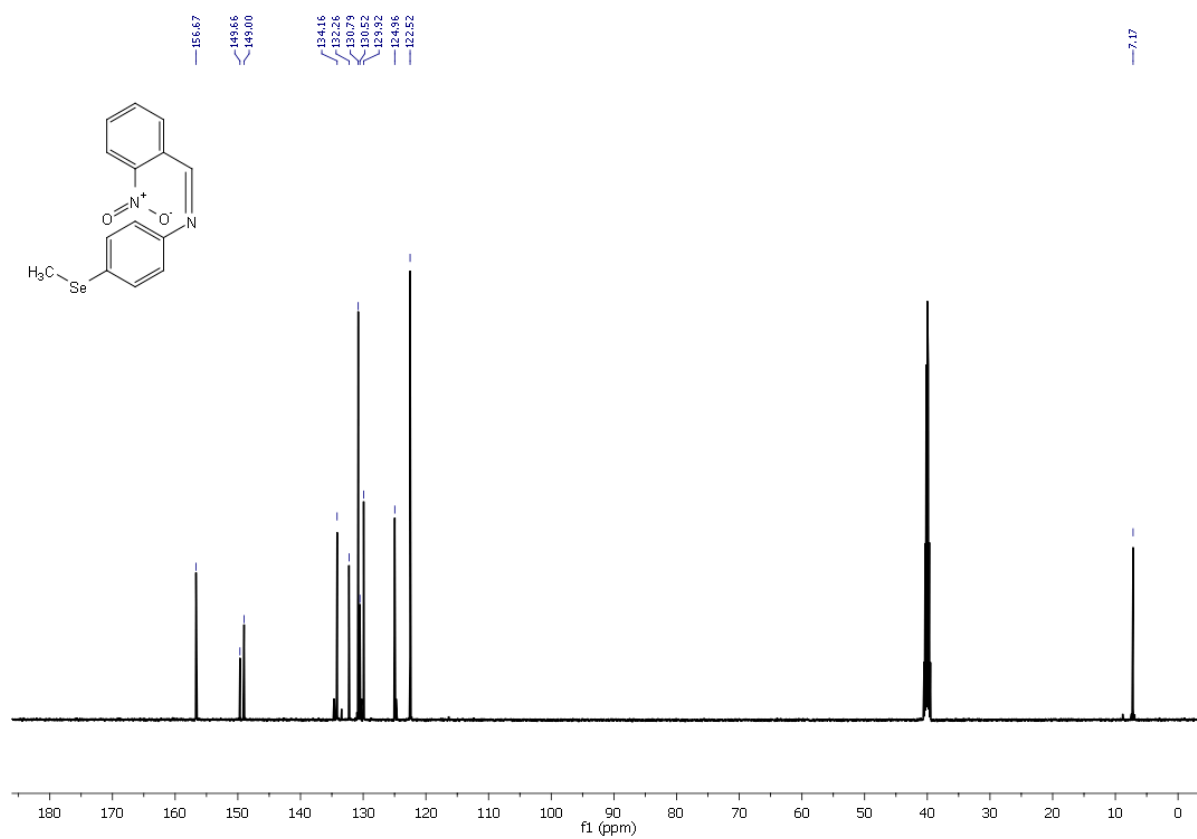

<sup>13</sup>CNMR chart of compound**6c**

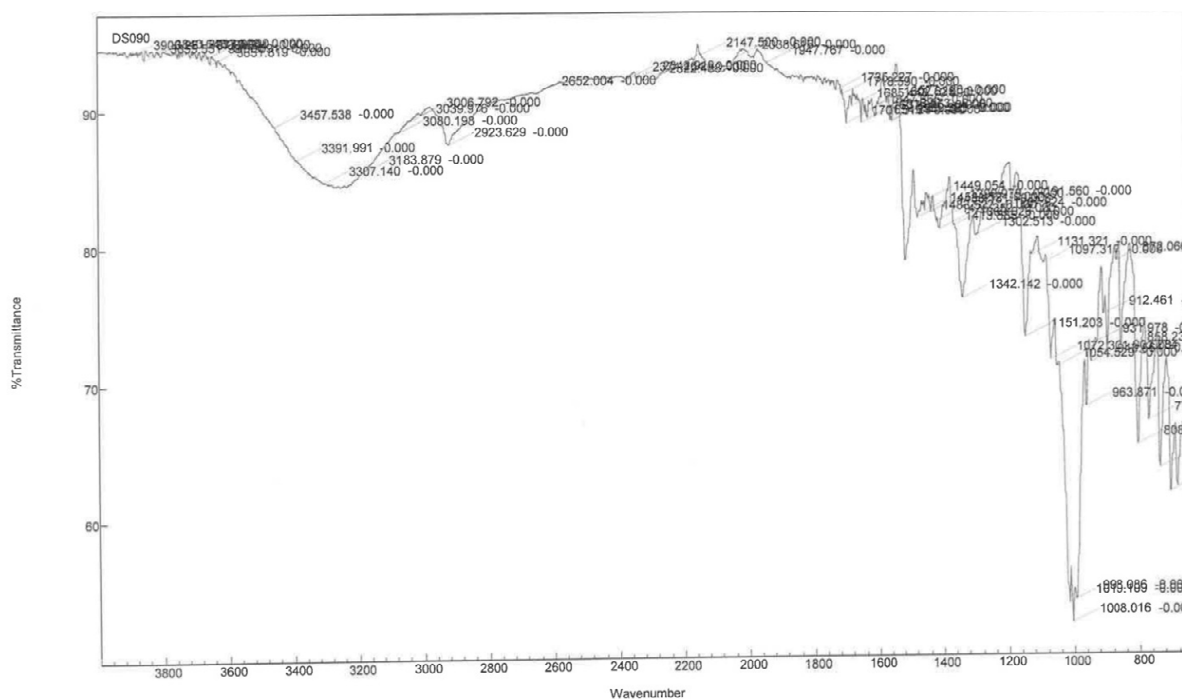

IR chart of compound 6c

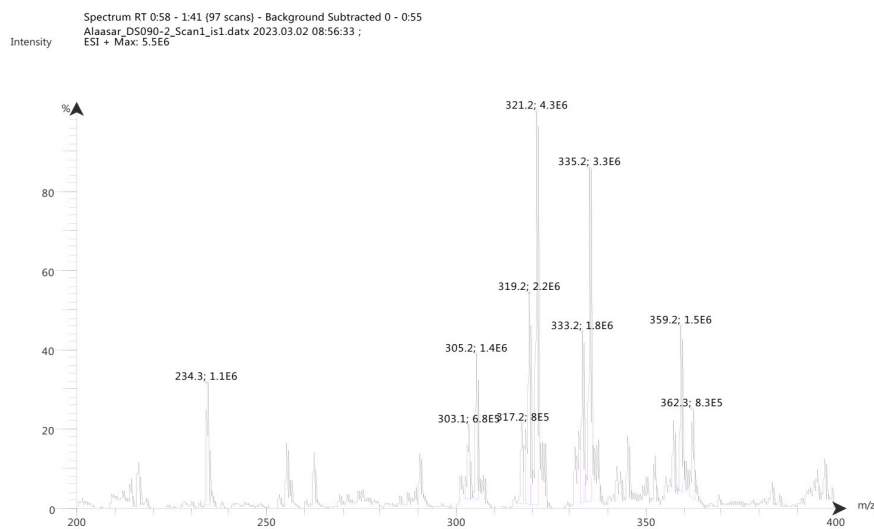

MS chart of compound 6c
